# Supplementary material
Source: PubMed Central journal article supplement (PMC6556125)

**(a)**

NORMAL

RVH

DHE

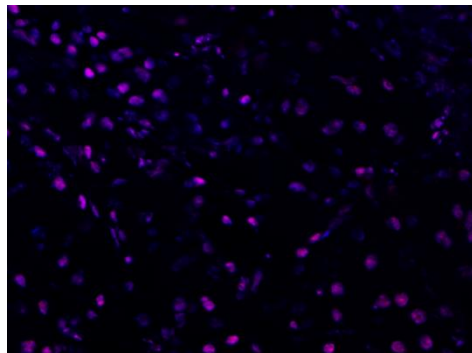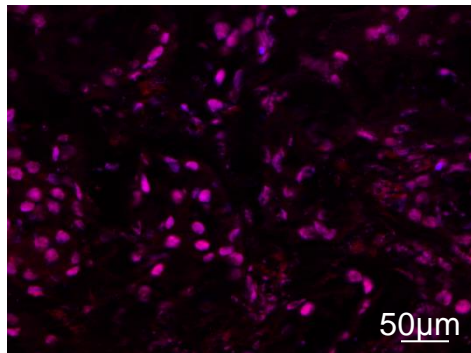

DHE (area %)

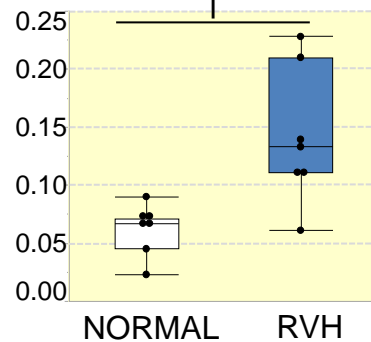**(b)**

PAS

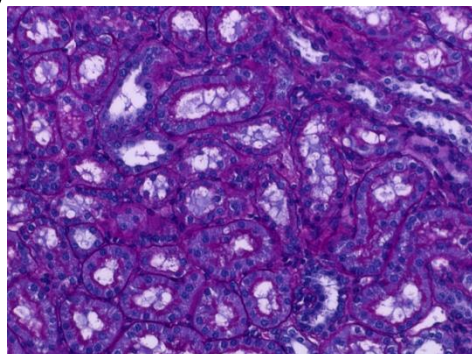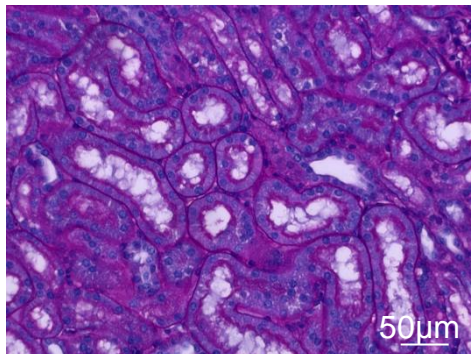

Tubular Injury Score (%)

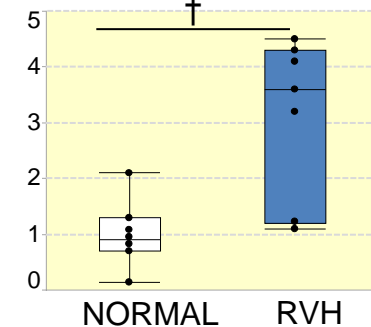**(c)**

Trichrome

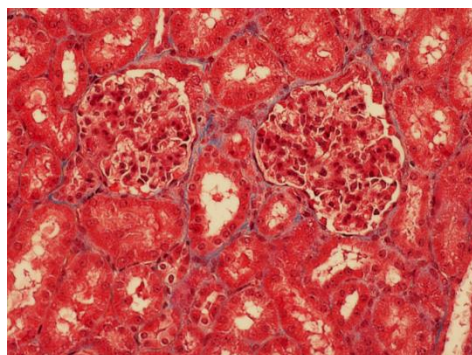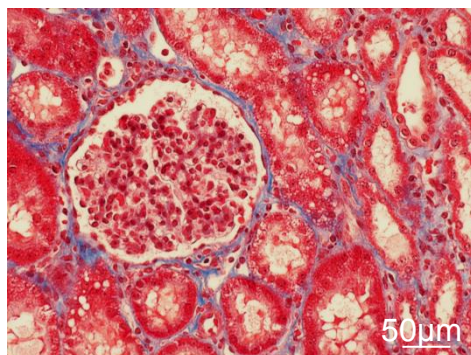

Tubulointerstitial fibrosis (area %)

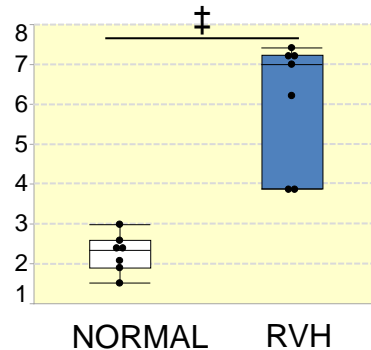

Supplement: NIHMS1014044-supplement-Supp_FigS5.pdf [file NIHMS1014044-supplement-Supp_FigS5.pdf]
