# Supplementary material
Source: PubMed Central journal article supplement (PMC6556125)

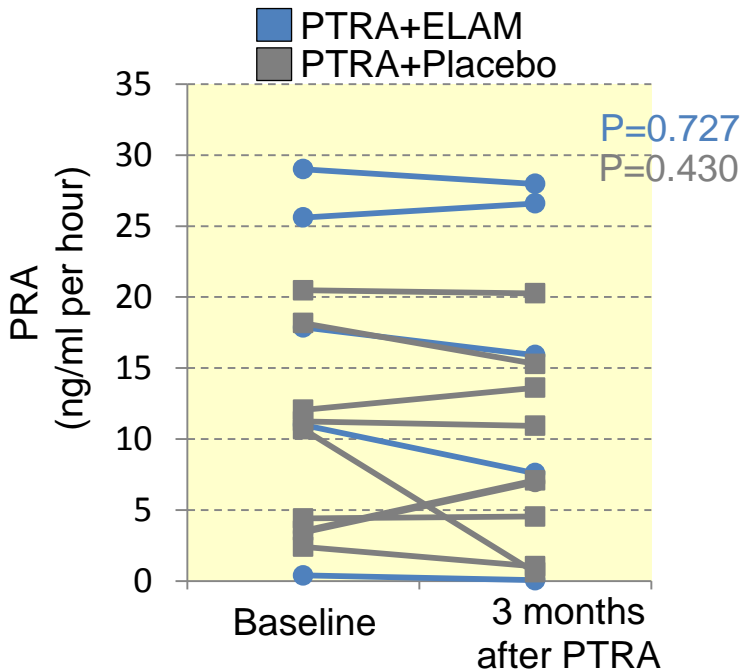

Supplement: NIHMS1014044-supplement-Supp_FigS2.pdf [file NIHMS1014044-supplement-Supp_FigS2.pdf]

**(a)**

■ PTRA+ELAM  
■ PTRA+Placebo

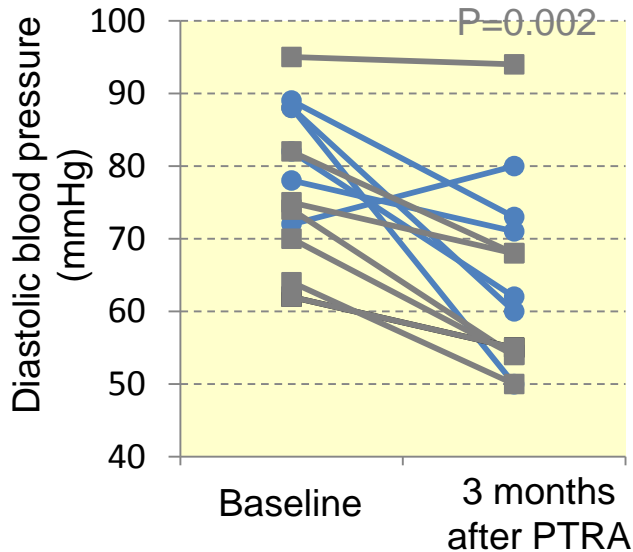**(b)**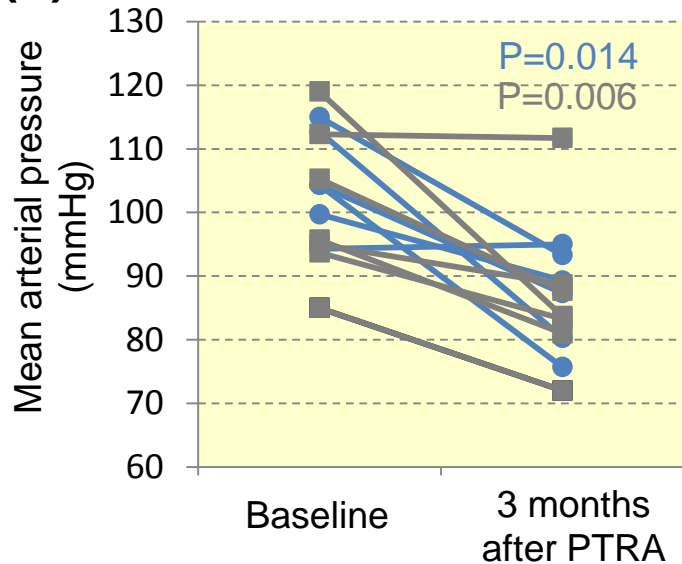

Supplement: NIHMS1014044-supplement-Supp_FigS3.pdf [file NIHMS1014044-supplement-Supp_FigS3.pdf]

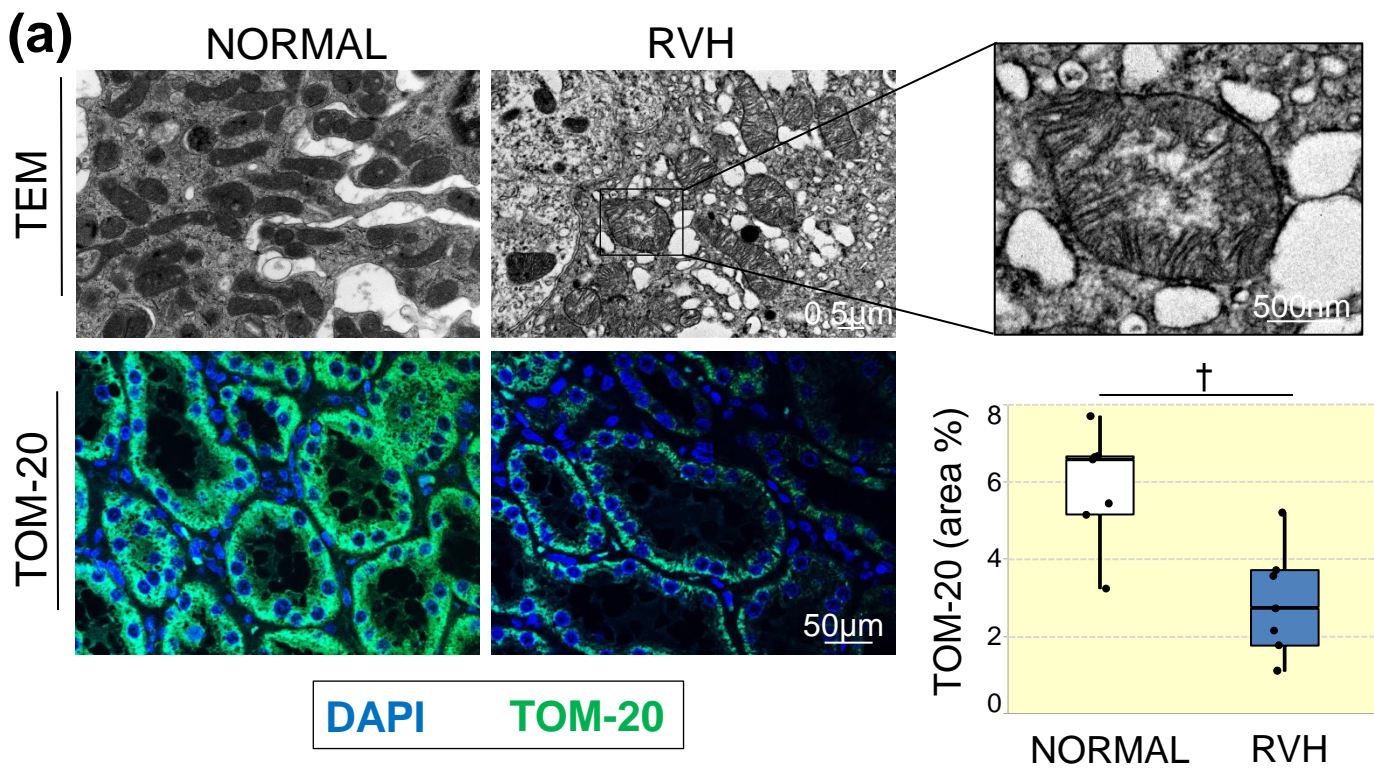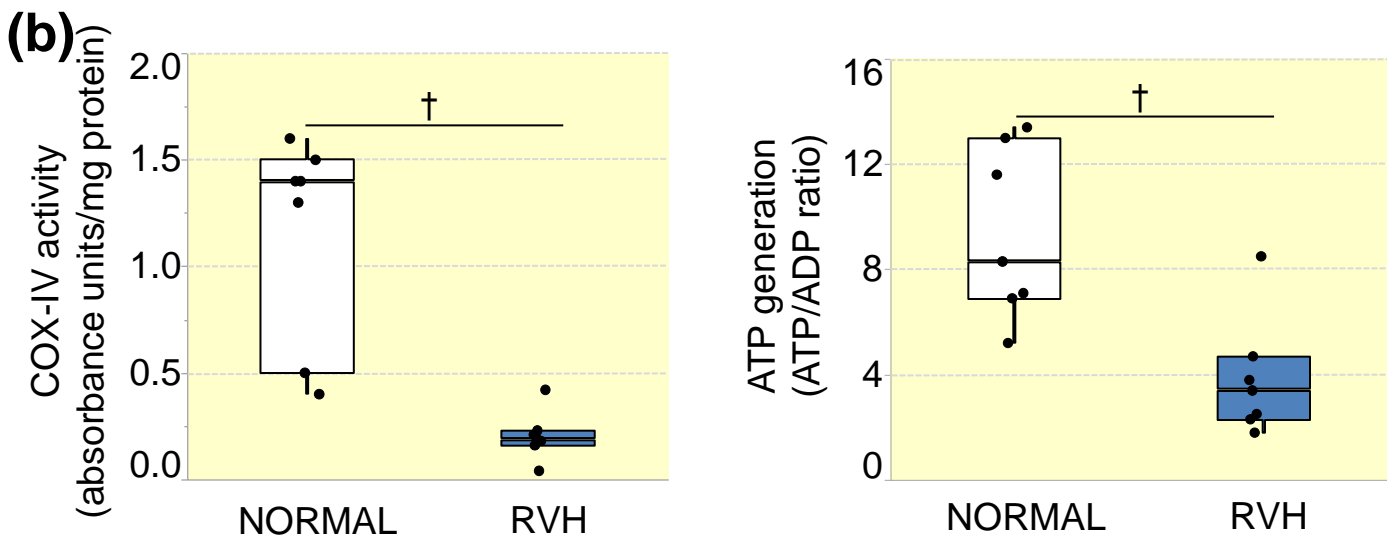

Supplement: NIHMS1014044-supplement-Supp_FigS4.pdf [file NIHMS1014044-supplement-Supp_FigS4.pdf]

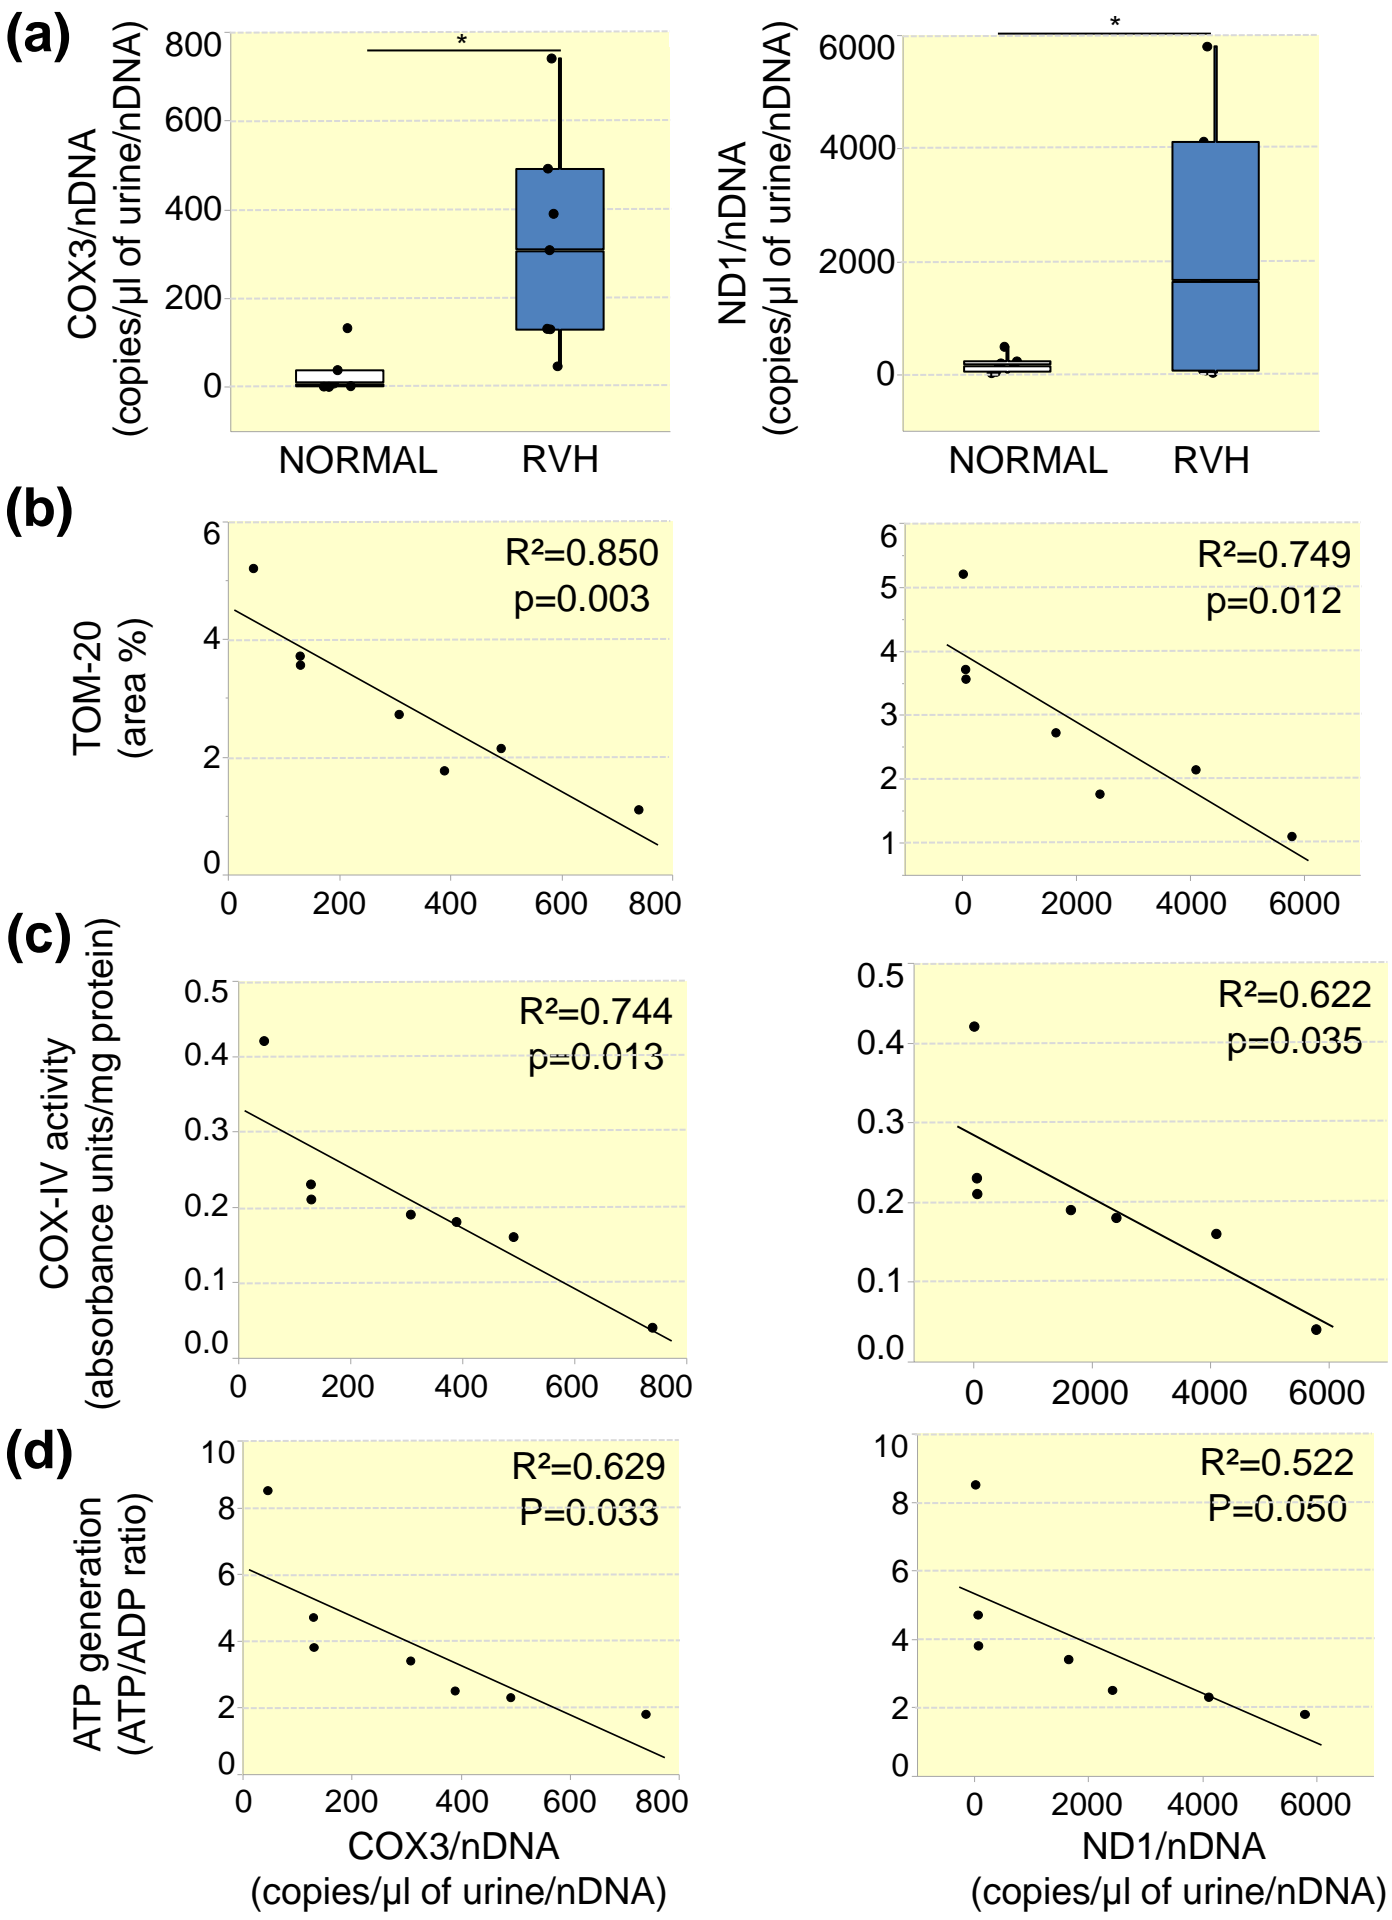

Supplement: NIHMS1014044-supplement-Supp_FigS6.pdf [file NIHMS1014044-supplement-Supp_FigS6.pdf]

COX3/nDNA  
(copies/ $\mu$ l of plasma/nDNA)

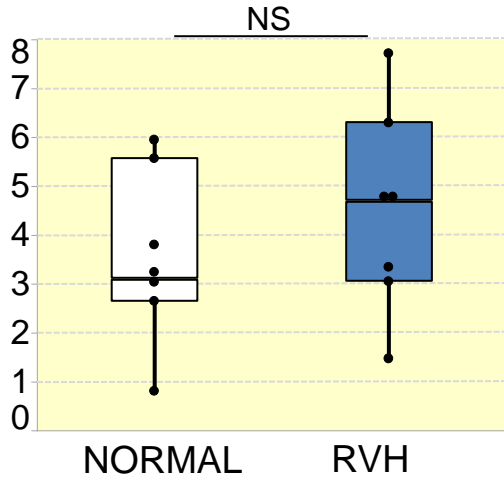

ND1/nDNA  
(copies/ $\mu$ l of plasma/nDNA)

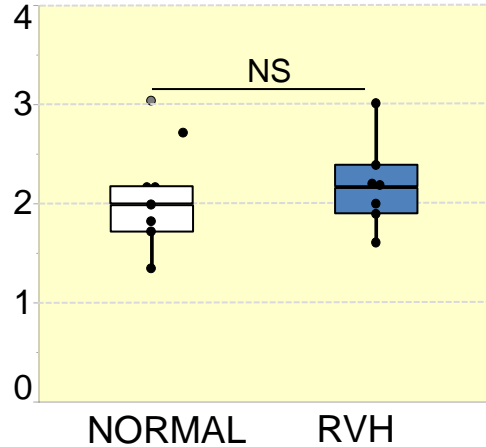

Supplement: NIHMS1014044-supplement-Supp_FigS7.pdf [file NIHMS1014044-supplement-Supp_FigS7.pdf]

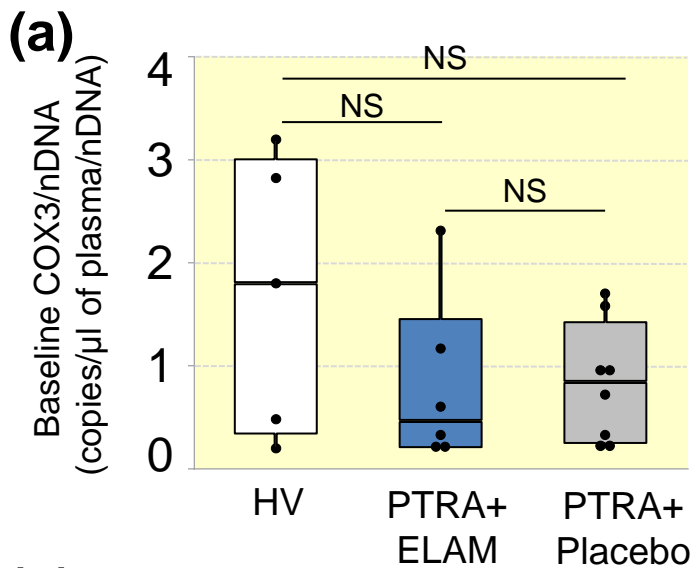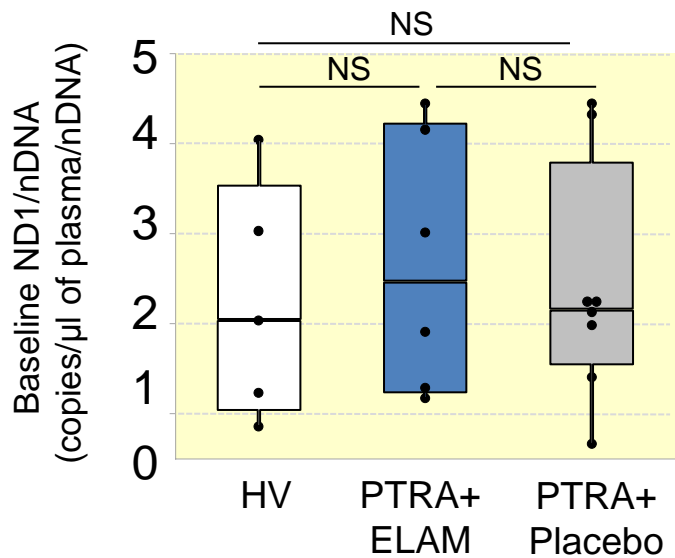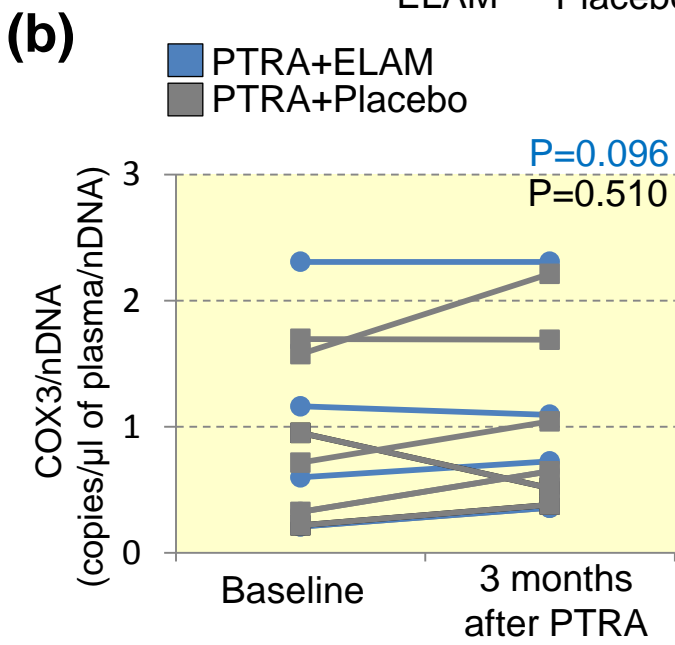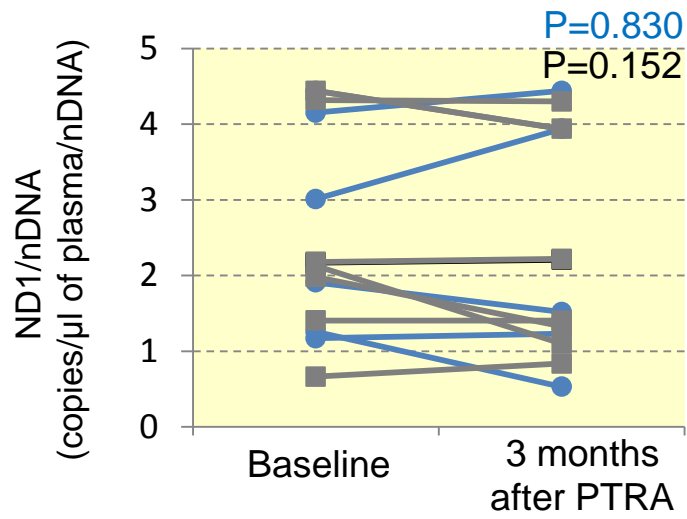

Supplement: NIHMS1014044-supplement-Supp_figS1.pdf [file NIHMS1014044-supplement-Supp_figS1.pdf]
